# Supplementary material for: Identifying critical recruitment bottlenecks limiting seedling establishment in a degraded seagrass ecosystem
Source: PubMed Central journal article supplement (PMC5665928; doi:10.1038/s41598-017-13833-y), 2017-11-01
Supplement: 41598_2017_13833_MOESM1_ESM.pdf [file 41598_2017_13833_MOESM1_ESM.pdf]

1 **Identifying critical recruitment bottlenecks limiting seedling establishment in a**  
2 **degraded seagrass ecosystem**

3

4 \*John Statton<sup>1</sup> - [john.statton@uwa.edu.au](mailto:john.statton@uwa.edu.au) (Mob) ++61 4 23 393 677 (W) ++61 8 6488 2306

5 Leonardo R. Montoya<sup>1</sup> - [leonardo.ruizmontoya@uwa.edu.au](mailto:leonardo.ruizmontoya@uwa.edu.au)

6 Robert J. Orth<sup>2</sup> - [jjorth@vims.edu](mailto:jjorth@vims.edu)

7 Kingsley W. Dixon<sup>3</sup> - [kingsley.dixon@curtin.edu.au](mailto:kingsley.dixon@curtin.edu.au)

8 Gary A. Kendrick<sup>1</sup> - [gary.kendrick@uwa.edu.au](mailto:gary.kendrick@uwa.edu.au)

9

10 <sup>1</sup>School of Biological Sciences and UWA Oceans Institute, Faculty of Natural and  
11 Agricultural Science, University of Western Australia, Crawley, 6009, Perth, Western  
12 Australia

13 <sup>2</sup>Virginia Institute of Marine Science, College of William and Mary, Gloucester Pt., 23061,  
14 VA, USA

15 <sup>3</sup>Department of Environment and Agriculture, Curtin University, Bentley, 6102, Perth,  
16 Western Australia

17

18 \*Correspondence to John Statton ([john.statton@uwa.edu.au](mailto:john.statton@uwa.edu.au))

19 Running title: Recruitment bottlenecks in seagrass seedlings

20

21

22 Table S1: Environmental characteristics (water depth, significant wave height, sediment grain  
 23 size and organic matter content, benthic light availability and temperature) at selected  
 24 locations (Southern Flats (SF), southern flats edge (SFe), Cockburn Sound east bank (CS),  
 25 Woodman Point (WP), Owen Anchorage (OA), Garden Island (GI), Carnac Island (CI), and  
 26 Parmelia Bank (PB)). Values are means ( $\pm 1$  SE).

| Location | Water depth (m) | Significant wave height (m) | Sediment grain-size (mm) | Sediment organic matter (% DW) | Daily irradiance (PAR, mols photons m <sup>-2</sup> d <sup>-1</sup> ) | Temperature (°C) |
|----------|-----------------|-----------------------------|--------------------------|--------------------------------|-----------------------------------------------------------------------|------------------|
| SF       | 2.41            | 0.08                        | 0.4 $\pm$ 0.02           | 2.27 $\pm$ 0.15                | 10.69 $\pm$ 1.96                                                      |                  |
| SFe      | 2.72            |                             |                          |                                |                                                                       |                  |
| CS       | 7.48            | 0.14                        | 0.31 $\pm$ 0.01          | 2.8 $\pm$ 0.26                 |                                                                       | 22.90 $\pm$ 0.60 |
| WP       | 4.29            | 0.24                        | 0.30 $\pm$ 0.03          | 2.5 $\pm$ 0.10                 |                                                                       |                  |
| OA       | 4.55            | 0.19                        | 0.36 $\pm$ 0.00          | 2.73 $\pm$ 0.32                | 7.10 $\pm$ 1.72                                                       | 22.56 $\pm$ 0.25 |
| GI       | 2.52            |                             | 0.23 $\pm$ 0.07          | 3.03 $\pm$ 0.12                |                                                                       |                  |
| CI       | 2.95            | 0.31                        | 0.27 $\pm$ 0.04          | 2.93 $\pm$ 0.15                |                                                                       |                  |
| PB       | 8.42            | 0.46                        | 0.27 $\pm$ 0.01          | 2.6 $\pm$ 0.36                 | 3.28 $\pm$ 0.91                                                       | 22.27 $\pm$ 0.27 |

27

28

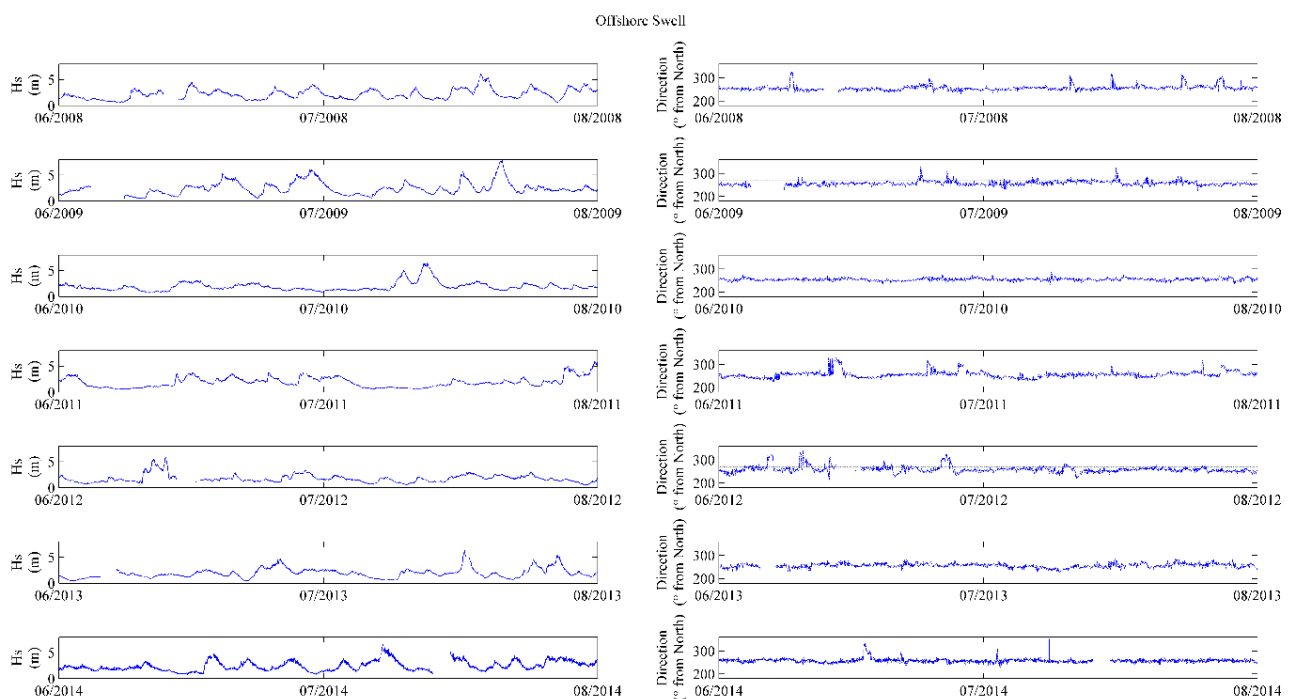

29

30 Figure S1: Historical significant wave height (Hs) and direction for the swell components at

31 Parmelia Bank, Western Australia. (left) Each major peak represents a large storm system

32 (arriving from any direction) from 2008 – 2014; (right) each major peak represents a large  
 33 storm system arriving from the north.

34 **Table S2 – S18:** S2 (original data supplied in the publication for reference); S3 – S7 (adult  
 35 fecundity values altered); S8 – S14 (adult mortality values altered); S15 – S18 (adult  
 36 fecundity and mortality values altered). Highlighted cells: Blue = the life stages with the  
 37 greatest sensitivities; Red = when the vegetative elasticity is lower than other life stages;  
 38 Green = the vegetative elasticity is greater than other life stages; Yellow = the threshold of  
 39 change (ie. when a change in value for adult mortality and/or fecundity causes a greater  
 40 change than the original values used in our statistical analysis for publication.

41 Table S2

| ORIGINAL FOR PUBLICATION mortality = 0.2 fecundity = 8 |             |                              |             |             |               |      |             |      |
|--------------------------------------------------------|-------------|------------------------------|-------------|-------------|---------------|------|-------------|------|
|                                                        |             | Sensitivities & Elasticities |             |             |               |      |             |      |
|                                                        | $\lambda$   |                              | Sd          | Ad          | Es            | Ns   | Ve          | f    |
| All sites as a single population                       | <b>0.49</b> | S=                           | <b>0.62</b> | 0.23        | <b>2.17</b>   | 0.09 | 0.3         | 0.01 |
|                                                        |             | E=                           | 0.18        | 0.18        | 0.18          | 0.18 | <b>0.12</b> | 0.18 |
| Low exposure; Shallow (SF, SFe)                        | 0.21        | S=                           | <b>8.24</b> | <b>2.29</b> | 0             | 0    | 0.91        | 0    |
|                                                        |             | E=                           | 0.02        | 0.02        | 0.02          | 0.02 | <b>0.89</b> | 0.02 |
| Low exposure; Deep (CS)                                | <b>0.71</b> | S=                           | <b>1.37</b> | <b>0.68</b> | 0.15          | 0.13 | 0.26        | 0.02 |
|                                                        |             | E=                           | 0.19        | 0.19        | 0.19          | 0.19 | <b>0.07</b> | 0.19 |
| Moderate exposure and depth (WP & OA)                  | 0.21        | S=                           | <b>4.12</b> | <b>4.58</b> | 0             | 0    | 0.91        | 0    |
|                                                        |             | E=                           | 0.02        | 0.02        | 0.02          | 0.02 | <b>0.89</b> | 0.02 |
| High exposure; Shallow (GI,CI)                         | 0.21        | S=                           | 0.01        | 0.01        | <b>538.22</b> | 0    | <b>0.91</b> | 0    |
|                                                        |             | E=                           | 0.02        | 0.02        | 0.02          | 0.02 | <b>0.89</b> | 0.02 |
| High exposure; Deep (PB)                               | 0.21        | S=                           | 0.02        | 0.01        | <b>581.74</b> | 0    | <b>0.91</b> | 0    |
|                                                        |             | E=                           | 0.02        | 0.02        | 0.02          | 0.02 | <b>0.89</b> | 0.02 |

42

43 Table S3

|             | fecundity = 3 |             |               |      |             |      |
|-------------|---------------|-------------|---------------|------|-------------|------|
| $\lambda$   | Sd            | Ad          | Es            | Ns   | Ve          | f    |
| <b>0.41</b> | <b>0.50</b>   | 0.18        | <b>1.76</b>   | 0.07 | 0.33        | 0.02 |
|             | 0.17          | 0.17        | 0.17          | 0.17 | <b>0.16</b> | 0.17 |
| 0.20        | <b>3.46</b>   | <b>0.96</b> | 0.00          | 0.00 | 0.96        | 0.00 |
|             | 0.01          | 0.01        | 0.01          | 0.01 | <b>0.95</b> | 0.01 |
| <b>0.60</b> | <b>1.12</b>   | <b>0.55</b> | 0.12          | 0.11 | 0.27        | 0.04 |
|             | 0.18          | 0.18        | 0.18          | 0.18 | <b>0.09</b> | 0.18 |
| 0.20        | <b>1.73</b>   | <b>1.93</b> | 0.00          | 0.00 | 0.96        | 0.00 |
|             | 0.01          | 0.01        | 0.01          | 0.01 | <b>0.95</b> | 0.01 |
| 0.20        | 0.01          | 0.01        | <b>226.26</b> | 0.00 | <b>0.96</b> | 0.00 |

|      |      |      |               |      |      |      |
|------|------|------|---------------|------|------|------|
|      | 0.01 | 0.01 | 0.01          | 0.01 | 0.95 | 0.01 |
| 0.20 | 0.01 | 0.00 | <b>244.55</b> | 0.00 | 0.96 | 0.00 |
|      | 0.01 | 0.01 | 0.01          | 0.01 | 0.95 | 0.01 |

44 Table S4

| fecundity = 5 |             |             |               |      |      |      |
|---------------|-------------|-------------|---------------|------|------|------|
| $\lambda$     | Sd          | Ad          | Es            | Ns   | Ve   | f    |
| <b>0.45</b>   | <b>0.56</b> | 0.20        | <b>1.97</b>   | 0.08 | 0.31 | 0.02 |
|               | 0.17        | 0.17        | 0.17          | 0.17 | 0.14 | 0.17 |
| 0.20          | <b>5.50</b> | <b>1.53</b> | 0.00          | 0.00 | 0.94 | 0.00 |
|               | 0.02        | 0.02        | 0.02          | 0.02 | 0.92 | 0.02 |
| <b>0.65</b>   | <b>1.24</b> | <b>0.62</b> | 0.14          | 0.12 | 0.26 | 0.02 |
|               | 0.18        | 0.18        | 0.18          | 0.18 | 0.08 | 0.18 |
| 0.20          | <b>2.75</b> | <b>3.06</b> | 0.00          | 0.00 | 0.94 | 0.00 |
|               | 0.02        | 0.02        | 0.02          | 0.02 | 0.92 | 0.02 |
| 0.20          | 0.01        | 0.01        | <b>359.45</b> | 0.00 | 0.94 | 0.00 |
|               | 0.02        | 0.02        | 0.02          | 0.02 | 0.92 | 0.02 |
| 0.20          | 0.01        | 0.01        | <b>388.51</b> | 0.00 | 0.94 | 0.00 |
|               | 0.02        | 0.02        | 0.02          | 0.02 | 0.92 | 0.02 |

45

46 Table S5

| fecundity = 7 |             |             |               |      |      |      |
|---------------|-------------|-------------|---------------|------|------|------|
| $\lambda$     | Sd          | Ad          | Es            | Ns   | Ve   | f    |
| <b>0.48</b>   | <b>0.61</b> | 0.22        | <b>2.11</b>   | 0.08 | 0.30 | 0.01 |
|               | 0.17        | 0.17        | 0.17          | 0.17 | 0.13 | 0.17 |
| 0.20          | <b>7.36</b> | <b>2.05</b> | 0.00          | 0.00 | 0.92 | 0.00 |
|               | 0.02        | 0.02        | 0.02          | 0.02 | 0.90 | 0.02 |
| <b>0.70</b>   | <b>1.33</b> | <b>0.66</b> | 0.15          | 0.13 | 0.26 | 0.02 |
|               | 0.19        | 0.19        | 0.19          | 0.19 | 0.07 | 0.19 |
| 0.20          | <b>3.68</b> | <b>4.10</b> | 0.00          | 0.00 | 0.92 | 0.00 |
|               | 0.02        | 0.02        | 0.02          | 0.02 | 0.90 | 0.02 |
| 0.20          | 0.01        | 0.01        | <b>481.14</b> | 0.00 | 0.92 | 0.00 |
|               | 0.02        | 0.02        | 0.02          | 0.02 | 0.90 | 0.02 |
| 0.20          | 0.02        | 0.01        | <b>520.04</b> | 0.00 | 0.92 | 0.00 |
|               | 0.02        | 0.02        | 0.02          | 0.02 | 0.90 | 0.02 |

47

48 Table S6

| fecundity = 11 |    |    |    |    |    |   |
|----------------|----|----|----|----|----|---|
| $\lambda$      | Sd | Ad | Es | Ns | Ve | f |

|             |              |             |               |      |      |      |
|-------------|--------------|-------------|---------------|------|------|------|
| <b>0.52</b> | <b>0.67</b>  | 0.24        | <b>2.33</b>   | 0.09 | 0.29 | 0.01 |
|             | 0.18         | 0.18        | 0.18          | 0.18 | 0.11 | 0.18 |
| 0.21        | <b>10.66</b> | <b>2.97</b> | 0.01          | 0.01 | 0.89 | 0.00 |
|             | 0.03         | 0.03        | 0.03          | 0.03 | 0.86 | 0.03 |
| <b>0.76</b> | <b>1.46</b>  | <b>0.72</b> | 0.16          | 0.14 | 0.25 | 0.01 |
|             | 0.19         | 0.19        | 0.19          | 0.19 | 0.07 | 0.19 |
| 0.21        | <b>5.33</b>  | <b>5.93</b> | 0.01          | 0.01 | 0.89 | 0.00 |
|             | 0.03         | 0.03        | 0.03          | 0.03 | 0.86 | 0.03 |
| 0.21        | 0.02         | 0.02        | <b>696.53</b> | 0.01 | 0.89 | 0.00 |
|             | 0.03         | 0.03        | 0.03          | 0.03 | 0.86 | 0.03 |
| 0.21        | 0.02         | 0.01        | <b>752.85</b> | 0.01 | 0.89 | 0.00 |
|             | 0.03         | 0.03        | 0.03          | 0.03 | 0.86 | 0.03 |

49

50 Table S7

| $\lambda$   | fecundity = 15 |             |               |      |      |      |
|-------------|----------------|-------------|---------------|------|------|------|
|             | Sd             | Ad          | Es            | Ns   | Ve   | f    |
| <b>0.55</b> | <b>0.71</b>    | 0.26        | <b>2.48</b>   | 0.10 | 0.28 | 0.01 |
|             | 0.18           | 0.18        | 0.18          | 0.18 | 0.10 | 0.18 |
| 0.21        | <b>13.51</b>   | <b>3.76</b> | 0.01          | 0.01 | 0.86 | 0.00 |
|             | 0.04           | 0.04        | 0.04          | 0.04 | 0.82 | 0.04 |
| <b>0.80</b> | <b>1.56</b>    | <b>0.77</b> | 0.17          | 0.15 | 0.25 | 0.01 |
|             | 0.19           | 0.19        | 0.19          | 0.19 | 0.06 | 0.19 |
| 0.21        | <b>6.76</b>    | <b>7.51</b> | 0.01          | 0.01 | 0.86 | 0.00 |
|             | 0.04           | 0.04        | 0.04          | 0.04 | 0.82 | 0.04 |
| 0.21        | 0.02           | 0.02        | <b>882.50</b> | 0.01 | 0.86 | 0.00 |
|             | 0.04           | 0.04        | 0.04          | 0.04 | 0.82 | 0.04 |
| 0.21        | 0.03           | 0.01        | <b>953.85</b> | 0.01 | 0.86 | 0.00 |
|             | 0.04           | 0.04        | 0.04          | 0.04 | 0.82 | 0.04 |

51

52 Table S8

| $\lambda$   | mortality = 0.05 |              |             |      |      |      |
|-------------|------------------|--------------|-------------|------|------|------|
|             | Sd               | Ad           | Es          | Ns   | Ve   | f    |
| <b>0.45</b> | <b>0.64</b>      | 0.23         | <b>2.23</b> | 0.09 | 0.22 | 0.01 |
|             | 0.20             | 0.20         | 0.20        | 0.20 | 0.02 | 0.20 |
| 0.11        | <b>34.00</b>     | <b>9.46</b>  | 0.02        | 0.02 | 0.31 | 0.00 |
|             | 0.17             | 0.17         | 0.17        | 0.17 | 0.14 | 0.17 |
| <b>0.68</b> | <b>1.38</b>      | <b>0.68</b>  | 0.15        | 0.13 | 0.21 | 0.02 |
|             | 0.20             | 0.20         | 0.20        | 0.20 | 0.02 | 0.20 |
| 0.11        | <b>17.01</b>     | <b>18.91</b> | 0.02        | 0.02 | 0.31 | 0.00 |

|      |      |      |                |      |      |      |
|------|------|------|----------------|------|------|------|
|      | 0.17 | 0.17 | 0.17           | 0.17 | 0.14 | 0.17 |
| 0.11 | 0.05 | 0.05 | <b>2221.38</b> | 0.02 | 0.31 | 0.00 |
|      | 0.17 | 0.17 | 0.17           | 0.17 | 0.14 | 0.17 |
| 0.11 | 0.07 | 0.03 | <b>2400.98</b> | 0.02 | 0.31 | 0.00 |
|      | 0.17 | 0.17 | 0.17           | 0.17 | 0.14 | 0.17 |

53

54 Table S9

| mortality = 0.06 |              |              |                |      |      |      |
|------------------|--------------|--------------|----------------|------|------|------|
| $\lambda$        | Sd           | Ad           | Es             | Ns   | Ve   | f    |
| <b>0.45</b>      | <b>0.64</b>  | 0.23         | <b>2.22</b>    | 0.09 | 0.22 | 0.01 |
|                  | 0.19         | 0.19         | 0.19           | 0.19 | 0.03 | 0.19 |
| 0.11             | <b>33.35</b> | 9.28         | 0.02           | 0.02 | 0.35 | 0.00 |
|                  | 0.16         | 0.16         | 0.16           | 0.16 | 0.18 | 0.16 |
| <b>0.68</b>      | <b>1.38</b>  | <b>0.68</b>  | 0.15           | 0.13 | 0.22 | 0.02 |
|                  | 0.20         | 0.20         | 0.20           | 0.20 | 0.02 | 0.20 |
| 0.11             | <b>16.68</b> | <b>18.56</b> | 0.02           | 0.02 | 0.35 | 0.00 |
|                  | 0.16         | 0.16         | 0.16           | 0.16 | 0.18 | 0.16 |
| 0.11             | 0.05         | 0.05         | <b>2179.17</b> | 0.02 | 0.35 | 0.00 |
|                  | 0.16         | 0.16         | 0.16           | 0.16 | 0.18 | 0.16 |
| 0.11             | 0.07         | 0.03         | <b>2355.36</b> | 0.02 | 0.35 | 0.00 |
|                  | 0.16         | 0.16         | 0.16           | 0.16 | 0.18 | 0.16 |

55

56 Table S10

| mortality = 0.1 |              |              |                |      |      |      |
|-----------------|--------------|--------------|----------------|------|------|------|
| $\lambda$       | Sd           | Ad           | Es             | Ns   | Ve   | f    |
| <b>0.46</b>     | <b>0.63</b>  | 0.23         | <b>2.22</b>    | 0.09 | 0.24 | 0.01 |
|                 | 0.19         | 0.19         | 0.19           | 0.19 | 0.05 | 0.19 |
| 0.13            | <b>28.39</b> | 7.90         | 0.02           | 0.02 | 0.52 | 0.00 |
|                 | 0.12         | 0.12         | 0.12           | 0.12 | 0.40 | 0.12 |
| <b>0.69</b>     | <b>1.38</b>  | <b>0.68</b>  | 0.15           | 0.13 | 0.23 | 0.02 |
|                 | 0.19         | 0.19         | 0.19           | 0.19 | 0.03 | 0.19 |
| 0.13            | <b>14.20</b> | <b>15.80</b> | 0.02           | 0.02 | 0.52 | 0.00 |
|                 | 0.12         | 0.12         | 0.12           | 0.12 | 0.40 | 0.12 |
| 0.13            | 0.04         | 0.05         | <b>1855.12</b> | 0.02 | 0.52 | 0.00 |
|                 | 0.12         | 0.12         | 0.12           | 0.12 | 0.40 | 0.12 |
| 0.13            | 0.06         | 0.03         | <b>2005.11</b> | 0.02 | 0.52 | 0.00 |
|                 | 0.12         | 0.12         | 0.12           | 0.12 | 0.40 | 0.12 |

57

58 Table S11

| mortality = 0.15 |              |             |                |      |      |      |
|------------------|--------------|-------------|----------------|------|------|------|
|                  |              |             |                |      |      |      |
| <b>0.48</b>      | <b>0.63</b>  | 0.23        | <b>2.20</b>    | 0.09 | 0.27 | 0.01 |
|                  | 0.18         | 0.18        | 0.18           | 0.18 | 0.08 | 0.18 |
| 0.16             | <b>17.39</b> | <b>4.84</b> | 0.01           | 0.01 | 0.76 | 0.00 |
|                  | 0.06         | 0.06        | 0.06           | 0.06 | 0.70 | 0.06 |
| <b>0.70</b>      | <b>1.38</b>  | <b>0.68</b> | 0.15           | 0.13 | 0.24 | 0.02 |
|                  | 0.19         | 0.19        | 0.19           | 0.19 | 0.05 | 0.19 |
| 0.16             | <b>8.70</b>  | <b>9.68</b> | 0.01           | 0.01 | 0.76 | 0.00 |
|                  | 0.06         | 0.06        | 0.06           | 0.06 | 0.70 | 0.06 |
| 0.16             | 0.03         | 0.03        | <b>1136.40</b> | 0.01 | 0.76 | 0.00 |
|                  | 0.06         | 0.06        | 0.06           | 0.06 | 0.70 | 0.06 |
| 0.16             | 0.04         | 0.02        | <b>1228.28</b> | 0.01 | 0.76 | 0.00 |
|                  | 0.06         | 0.06        | 0.06           | 0.06 | 0.70 | 0.06 |

59

60 Table S12

| mortality = 0.25 |             |             |               |      |      |      |
|------------------|-------------|-------------|---------------|------|------|------|
| $\lambda$        | Sd          | Ad          | Es            | Ns   | Ve   | f    |
| <b>0.51</b>      | <b>0.61</b> | 0.22        | <b>2.14</b>   | 0.08 | 0.33 | 0.01 |
|                  | 0.17        | 0.17        | 0.17          | 0.17 | 0.16 | 0.17 |
| 0.25             | <b>3.82</b> | <b>1.06</b> | 0.00          | 0.00 | 0.97 | 0.00 |
|                  | 0.01        | 0.01        | 0.01          | 0.01 | 0.96 | 0.01 |
| <b>0.73</b>      | <b>1.36</b> | <b>0.67</b> | 0.15          | 0.13 | 0.28 | 0.02 |
|                  | 0.18        | 0.18        | 0.18          | 0.18 | 0.09 | 0.18 |
| 0.25             | <b>1.91</b> | <b>2.12</b> | 0.00          | 0.00 | 0.97 | 0.00 |
|                  | 0.01        | 0.01        | 0.01          | 0.01 | 0.96 | 0.01 |
| 0.25             | 0.01        | 0.01        | <b>249.49</b> | 0.00 | 0.97 | 0.00 |
|                  | 0.01        | 0.01        | 0.01          | 0.01 | 0.96 | 0.01 |
| 0.25             | 0.01        | 0.00        | <b>269.66</b> | 0.00 | 0.97 | 0.00 |
|                  | 0.01        | 0.01        | 0.01          | 0.01 | 0.96 | 0.01 |

61

62 Table S13

| mortality = 0.3 |             |             |             |      |      |      |
|-----------------|-------------|-------------|-------------|------|------|------|
| $\lambda$       | Sd          | Ad          | Es          | Ns   | Ve   | f    |
| <b>0.52</b>     | <b>0.60</b> | 0.22        | <b>2.08</b> | 0.08 | 0.37 | 0.01 |
|                 | 0.16        | 0.16        | 0.16        | 0.16 | 0.21 | 0.16 |
| 0.30            | <b>1.92</b> | <b>0.53</b> | 0.00        | 0.00 | 0.99 | 0.00 |

|             |             |             |               |      |      |      |
|-------------|-------------|-------------|---------------|------|------|------|
|             | 0.00        | 0.00        | 0.00          | 0.00 | 0.98 | 0.00 |
| <b>0.74</b> | <b>1.35</b> | <b>0.67</b> | 0.15          | 0.13 | 0.30 | 0.02 |
|             | 0.18        | 0.18        | 0.18          | 0.18 | 0.12 | 0.18 |
| 0.30        | <b>0.96</b> | <b>1.07</b> | 0.00          | 0.00 | 0.99 | 0.00 |
|             | 0.00        | 0.00        | 0.00          | 0.00 | 0.98 | 0.00 |
| 0.30        | 0.00        | 0.00        | <b>125.30</b> | 0.00 | 0.99 | 0.00 |
|             | 0.00        | 0.00        | 0.00          | 0.00 | 0.98 | 0.00 |
| 0.30        | 0.00        | 0.00        | <b>135.43</b> | 0.00 | 0.99 | 0.00 |
|             | 0.00        | 0.00        | 0.00          | 0.00 | 0.98 | 0.00 |

63

64 Table S14

| mortality = 0.5 |             |             |              |      |      |      |
|-----------------|-------------|-------------|--------------|------|------|------|
|                 |             |             |              |      |      |      |
| <b>0.62</b>     | <b>0.48</b> | 0.17        | <b>1.67</b>  | 0.07 | 0.57 | 0.01 |
|                 | 0.11        | 0.11        | 0.11         | 0.11 | 0.46 | 0.11 |
| 0.50            | <b>0.26</b> | <b>0.07</b> | 0.00         | 0.00 | 1.00 | 0.00 |
|                 | 0.00        | 0.00        | 0.00         | 0.00 | 1.00 | 0.00 |
| <b>0.81</b>     | <b>1.27</b> | <b>0.63</b> | 0.14         | 0.12 | 0.40 | 0.02 |
|                 | 0.15        | 0.15        | 0.15         | 0.15 | 0.24 | 0.15 |
| 0.50            | <b>0.13</b> | <b>0.14</b> | 0.00         | 0.00 | 1.00 | 0.00 |
|                 | 0.00        | 0.00        | 0.00         | 0.00 | 1.00 | 0.00 |
| 0.50            | 0.00        | 0.00        | <b>16.67</b> | 0.00 | 1.00 | 0.00 |
|                 | 0.00        | 0.00        | 0.00         | 0.00 | 1.00 | 0.00 |
| 0.50            | 0.00        | 0.00        | <b>18.02</b> | 0.00 | 1.00 | 0.00 |
|                 | 0.00        | 0.00        | 0.00         | 0.00 | 1.00 | 0.00 |

65

66 Table S15

| mortality = 0.1 fecundity = 4 |              |              |                |      |      |      |
|-------------------------------|--------------|--------------|----------------|------|------|------|
| $\lambda$                     | Sd           | Ad           | Es             | Ns   | Ve   | f    |
| <b>0.41</b>                   | <b>0.55</b>  | 0.20         | <b>1.93</b>    | 0.08 | 0.25 | 0.02 |
|                               | 0.19         | 0.19         | 0.19           | 0.19 | 0.06 | 0.19 |
| 0.12                          | <b>22.18</b> | <b>6.17</b>  | 0.01           | 0.01 | 0.59 | 0.00 |
|                               | 0.10         | 0.10         | 0.10           | 0.10 | 0.49 | 0.10 |
| <b>0.60</b>                   | <b>1.20</b>  | <b>0.59</b>  | 0.13           | 0.12 | 0.23 | 0.03 |
|                               | 0.19         | 0.19         | 0.19           | 0.19 | 0.04 | 0.19 |
| 0.12                          | <b>11.09</b> | <b>12.34</b> | 0.01           | 0.01 | 0.59 | 0.00 |
|                               | 0.10         | 0.10         | 0.10           | 0.10 | 0.49 | 0.10 |
| 0.12                          | 0.03         | 0.04         | <b>1449.17</b> | 0.01 | 0.59 | 0.00 |
|                               | 0.10         | 0.10         | 0.10           | 0.10 | 0.49 | 0.10 |



|      |      |      |                |      |             |      |
|------|------|------|----------------|------|-------------|------|
| 0.12 | 0.05 | 0.02 | <b>1566.34</b> | 0.01 | <i>0.59</i> | 0.00 |
|      | 0.10 | 0.10 | 0.10           | 0.10 | <i>0.49</i> | 0.10 |

67 Table S16

| mortality = 0.1 fecundity = 12 |              |              |                |      |             |      |
|--------------------------------|--------------|--------------|----------------|------|-------------|------|
| $\lambda$                      | Sd           | Ad           | Es             | Ns   | Ve          | f    |
| <b>0.50</b>                    | <i>0.69</i>  | 0.25         | <b>2.41</b>    | 0.10 | 0.24        | 0.01 |
|                                | 0.19         | 0.19         | 0.19           | 0.19 | <i>0.05</i> | 0.19 |
| 0.14                           | <b>32.20</b> | <i>8.96</i>  | 0.02           | 0.02 | 0.48        | 0.00 |
|                                | 0.13         | 0.13         | 0.13           | 0.13 | <i>0.35</i> | 0.13 |
| <b>0.75</b>                    | <i>1.50</i>  | <i>0.74</i>  | 0.16           | 0.14 | 0.22        | 0.01 |
|                                | 0.19         | 0.19         | 0.19           | 0.19 | <i>0.03</i> | 0.19 |
| 0.14                           | <b>16.11</b> | <b>17.92</b> | 0.02           | 0.02 | 0.48        | 0.00 |
|                                | 0.13         | 0.13         | 0.13           | 0.13 | <i>0.35</i> | 0.13 |
| 0.14                           | 0.05         | 0.05         | <b>2104.02</b> | 0.02 | <i>0.48</i> | 0.00 |
|                                | 0.13         | 0.13         | 0.13           | 0.13 | <i>0.35</i> | 0.13 |
| 0.14                           | 0.07         | 0.03         | <b>2274.13</b> | 0.02 | <i>0.48</i> | 0.00 |
|                                | 0.13         | 0.13         | 0.13           | 0.13 | <i>0.35</i> | 0.13 |

68

69 Table S17

| mortality = 0.27 fecundity = 4 |             |             |               |      |             |      |
|--------------------------------|-------------|-------------|---------------|------|-------------|------|
| $\lambda$                      | Sd          | Ad          | Es            | Ns   | Ve          | f    |
| <b>0.46</b>                    | <i>0.52</i> | 0.19        | <b>1.80</b>   | 0.07 | 0.38        | 0.02 |
|                                | 0.16        | 0.16        | 0.16          | 0.16 | <i>0.22</i> | 0.16 |
| 0.27                           | <b>1.47</b> | <i>0.41</i> | 0.00          | 0.00 | 0.99        | 0.00 |
|                                | 0.00        | 0.00        | 0.00          | 0.00 | <i>0.98</i> | 0.00 |
| <b>0.65</b>                    | <i>1.17</i> | <i>0.58</i> | 0.13          | 0.11 | 0.30        | 0.03 |
|                                | 0.18        | 0.18        | 0.18          | 0.18 | <i>0.12</i> | 0.18 |
| 0.27                           | <b>0.73</b> | <b>0.82</b> | 0.00          | 0.00 | 0.99        | 0.00 |
|                                | 0.00        | 0.00        | 0.00          | 0.00 | <i>0.98</i> | 0.00 |
| 0.27                           | 0.00        | 0.00        | <b>95.90</b>  | 0.00 | <i>0.99</i> | 0.00 |
|                                | 0.00        | 0.00        | 0.00          | 0.00 | <i>0.98</i> | 0.00 |
| 0.27                           | 0.00        | 0.00        | <b>103.66</b> | 0.00 | <i>0.99</i> | 0.00 |
|                                | 0.00        | 0.00        | 0.00          | 0.00 | <i>0.98</i> | 0.00 |

70

71 Table S18

| mortality = 0.27 fecundity = 12 |             |      |             |      |      |      |
|---------------------------------|-------------|------|-------------|------|------|------|
| $\lambda$                       | Sd          | Ad   | Es          | Ns   | Ve   | f    |
| <b>0.55</b>                     | <i>0.66</i> | 0.24 | <b>2.32</b> | 0.09 | 0.33 | 0.01 |

|      |      |      |        |      |      |      |
|------|------|------|--------|------|------|------|
|      | 0.17 | 0.17 | 0.17   | 0.17 | 0.16 | 0.17 |
| 0.27 | 4.20 | 1.17 | 0.00   | 0.00 | 0.97 | 0.00 |
|      | 0.01 | 0.01 | 0.01   | 0.01 | 0.96 | 0.01 |
| 0.79 | 1.48 | 0.73 | 0.16   | 0.14 | 0.28 | 0.01 |
|      | 0.18 | 0.18 | 0.18   | 0.18 | 0.09 | 0.18 |
| 0.27 | 2.10 | 2.34 | 0.00   | 0.00 | 0.97 | 0.00 |
|      | 0.01 | 0.01 | 0.01   | 0.01 | 0.96 | 0.01 |
| 0.27 | 0.01 | 0.01 | 274.69 | 0.00 | 0.97 | 0.00 |
|      | 0.01 | 0.01 | 0.01   | 0.01 | 0.96 | 0.01 |
| 0.27 | 0.01 | 0.00 | 296.90 | 0.00 | 0.97 | 0.00 |
|      | 0.01 | 0.01 | 0.01   | 0.01 | 0.96 | 0.01 |
